# Supplementary material for: miR-9-5p, miR-675-5p and miR-138-5p Damages the Strontium and LRP5-Mediated Skeletal Cell Proliferation, Differentiation, and Adhesion
Source: PubMed Central journal article supplement (PMC4783967; doi:10.3390/ijms17020236), 2016-02-15
Supplement: ijms-17-00236-s001.pdf [file ijms-17-00236-s001.pdf]

# Supplementary Materials: miR-9-5p, miR-675-5p, and miR-138-5p Damages the Strontium and LRP5-Mediated Skeletal Cell Proliferation, Differentiation, and Adhesion

Tianhao Sun, Frankie Leung and William W. Lu

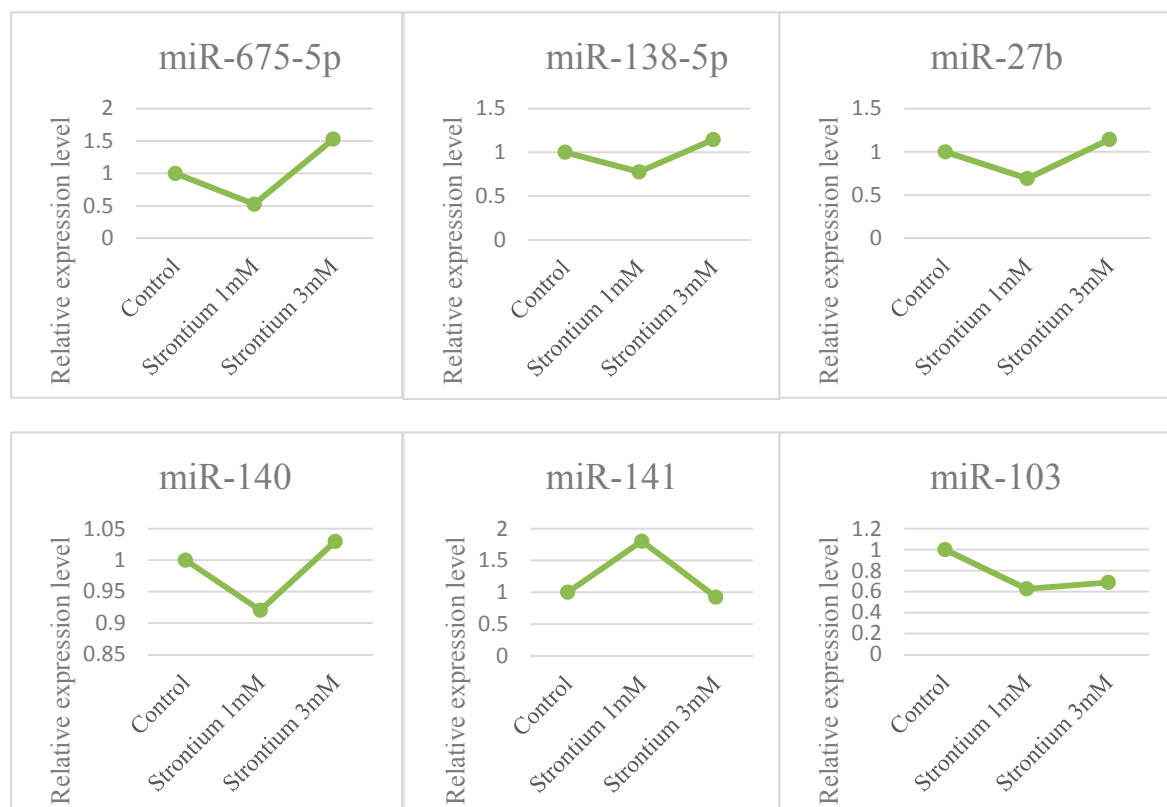

**Figure S1.** Expression levels of miRNAs in MC3T3-E1 cells upon strontium ranelate treatment.

**Table S1.** The expression changes of the 15 cell adhesion makers of MC3T3-E1 cell treated with miR-9-5p, miR-675-5p, and miR-138-5p mimics.

| Name                | miR-9-5p               |                   |      | miR-675-5p             |                   |      | miR-138-5p             |                   |      |
|---------------------|------------------------|-------------------|------|------------------------|-------------------|------|------------------------|-------------------|------|
|                     | Average<br>Fold Change | <i>p</i><br>Value | SD   | Average<br>Fold Change | <i>p</i><br>Value | SD   | Average<br>Fold Change | <i>p</i><br>Value | SD   |
| Integrin $\alpha$ 2 | 0.44                   | 0.004             | 0.17 | 0.65                   | 0.214             | 0.41 | 0.50                   | 0.163             | 0.51 |
| Integrin $\alpha$ 5 | 1.07                   | 0.544             | 0.19 | 0.31                   | 0.000             | 0.05 | 0.36                   | 0.000             | 0.03 |
| Integrin $\alpha$ V | 0.54                   | 0.001             | 0.09 | 0.24                   | 0.000             | 0.10 | 0.23                   | 0.000             | 0.04 |
| Integrin $\beta$ 1  | 0.81                   | 0.144             | 0.18 | 0.52                   | 0.041             | 0.28 | 0.51                   | 0.007             | 0.16 |
| Fibronectin         | 0.63                   | 0.001             | 0.07 | 0.37                   | 0.001             | 0.13 | 0.46                   | 0.003             | 0.15 |
| FAK                 | 1.26                   | 0.278             | 0.36 | 0.54                   | 0.037             | 0.26 | 0.48                   | 0.005             | 0.16 |
| Vinculin            | 0.45                   | 0.001             | 0.10 | 0.35                   | 0.005             | 0.20 | 0.41                   | 0.000             | 0.09 |
| Osteocalcin         | 1.10                   | 0.889             | 1.20 | 0.47                   | 0.003             | 0.14 | 0.80                   | 0.143             | 0.19 |
| Osteonectin         | 0.55                   | 0.005             | 0.14 | 0.76                   | 0.391             | 0.43 | 0.95                   | 0.785             | 0.30 |
| Osteopontin         | 2.60                   | 0.017             | 0.70 | 0.89                   | 0.706             | 0.47 | 1.22                   | 0.364             | 0.37 |
| Type I collagen     | 0.35                   | 0.000             | 0.05 | 0.20                   | 0.000             | 0.04 | 0.22                   | 0.000             | 0.05 |
| Type III collagen   | 0.23                   | 0.000             | 0.03 | 1.17                   | 0.038             | 0.10 | 0.85                   | 0.073             | 0.11 |
| Cadherin 11         | 0.74                   | 0.054             | 0.17 | 0.33                   | 0.002             | 0.17 | 0.60                   | 0.005             | 0.13 |
| MAPK                | 1.13                   | 0.480             | 0.29 | 0.29                   | 0.002             | 0.16 | 0.43                   | 0.002             | 0.13 |
| NFKB                | 0.74                   | 0.013             | 0.11 | 0.39                   | 0.000             | 0.07 | 0.72                   | 0.028             | 0.14 |
